# Supplementary material for: Associations of seasonally available global positioning systems-derived walkability and objectively measured sleep in the Nurses’ Health Study 3 Mobile Health Substudy
Source: PubMed Central journal article supplement — Environ Epidemiol. 2024 Oct 10;8(6):e348. doi: 10.1097/EE9.0000000000000348 (PMC11469837; doi:10.1097/ee9.0000000000000348), 2024-10-10
Supplement: ee9-8-e348-s001.pdf [file ee9-8-e348-s001.pdf]

## Supplementary Information

**eTable 1. Participant characteristics of the 276 Nurses' Health Study 3 Mobile Health Substudy participants included in the analysis and of the 402 participants who provided Fitbit sleep data and 511 participants who were consented in the study.**

|                                                | <b>N = 276<br/>Included in<br/>analysis</b> | <b>N = 402<br/>Had Fitbit<br/>sleep data</b> | <b>N = 511<br/>Consented in<br/>study</b> |
|------------------------------------------------|---------------------------------------------|----------------------------------------------|-------------------------------------------|
| <b>Participant Characteristic</b>              |                                             | <b>Mean (SD)</b>                             |                                           |
| Age (years)                                    | 39.58 (7.10)                                | 39.54 (7.24)                                 | 39.99 (7.20)                              |
|                                                |                                             | <b>n (%)</b>                                 |                                           |
| Advanced degree (% yes)                        | 71 (25.7)                                   | 100 (24.9)                                   | 128 (25.1)                                |
| Employed (% yes)                               | 260 (94.2)                                  | 373 (95.6)                                   | 476 (96.0)                                |
| Married (% yes)                                | 170 (61.6)                                  | 241 (60.0%)                                  | 302 (59.1)                                |
| Race (% white)                                 | 264 (95.7)                                  | 378 (95.7)                                   | 479 (95.4)                                |
| Depression (% yes)                             | 86 (31.2)                                   | 122 (30.4)                                   | 148 (29.0)                                |
| Region (%)                                     |                                             |                                              |                                           |
| Midwest                                        | 66 (23.9)                                   | 117 (29.1)                                   | 151 (29.5)                                |
| Northeast                                      | 64 (23.2)                                   | 96 (23.9)                                    | 122 (23.9)                                |
| South                                          | 77 (27.9)                                   | 97 (24.1)                                    | 120 (23.5)                                |
| West                                           | 69 (25.0)                                   | 86 (21.4)                                    | 110 (21.5)                                |
| Missing                                        | 0 (0)                                       | 6 (1.5)                                      | 8 (1.6)                                   |
| Alcohol consumption (% $\geq 1$<br>drink/day ) | 6 (2.2)                                     | 6 (1.5)                                      | 9 (1.8)                                   |

**eTable 2. Effect estimates of a one IQR increase in walkability exposure on sleep duration (continuous) for sensitivity analyses: excluding sleep periods on dates for which naps occurred, excluding dates either on or following reported shiftwork, excluding participants who self-reported doctor-diagnosed depression, excluding sleep periods that were calculated from the “Classic” algorithm.**

|                         | N<br>participants | N<br>sleep | Effect Estimate | 95% CI        |
|-------------------------|-------------------|------------|-----------------|---------------|
| <i>Main association</i> | 276               | 3592       | -1.77           | (-4.99, 1.46) |
| <i>Excluding</i>        |                   |            |                 |               |
| Naps                    | 275               | 3330       | -2.11           | (-5.35, 1.13) |
| Shiftwork               | 276               | 3542       | -1.81           | (-5.05, 1.43) |
| Depression              | 190               | 2571       | -2.18           | (-5.91, 1.56) |
| Classic algorithm       | 256               | 3140       | -0.08           | (-3.21, 3.06) |

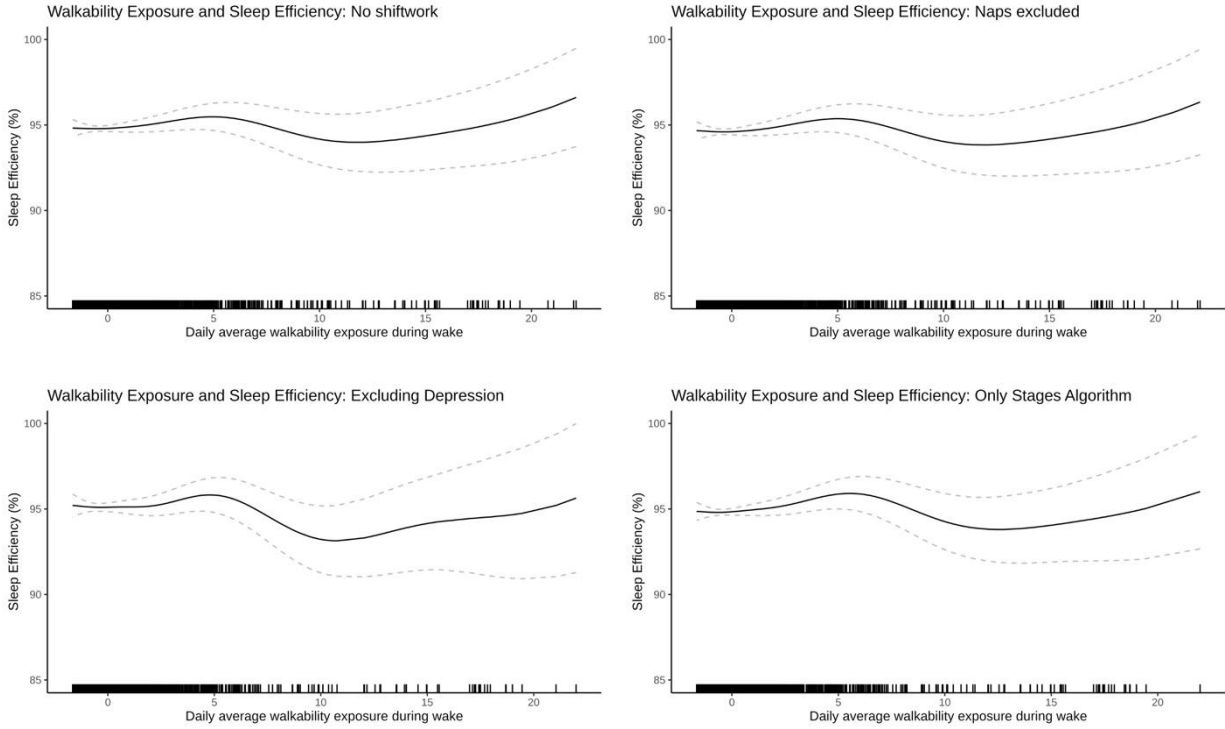

**eAppendix 1. Fully adjusted associations between walkability exposure and sleep efficiency (continuous) for sensitivity analyses: excluding sleep periods on dates for which naps occurred, excluding dates either on or following reported shiftwork, excluding participants who self-reported doctor-diagnosed depression, excluding sleep periods that were not calculated from the “Stages” algorithm.**
